# Supplementary material
Source: MDPI journal article supplement (https://www.mdpi.com/2073-4395/13/11/2841)
Supplement: s1 [file s1]

# Introducing Autochthonous Bacterium and Fungus Composition to Enhance the Phytopathogen-Suppressive Capacity of Composts against *Clonostachys rosea*, *Penicillium solitum* and *Alternaria alternata* In Vitro

Vladimir Mironov<sup>1,\*</sup>, Anna Shchelushkina<sup>1</sup>, Olga Selitskaya<sup>2</sup>, Yury Nikolaev<sup>1</sup>, Alexander Merkel<sup>1</sup> and Shenghua Zhang<sup>3</sup>

<sup>1</sup> Winogradsky Institute of Microbiology, Research Center of Biotechnology of the Russian Academy of Sciences, 119071 Moscow, Russia; schelushkina@yandex.ru (A.S.)

<sup>2</sup> Department of Microbiology and Immunology, Russian State Agrarian University—Moscow Timiryazev Agricultural Academy, 127550 Moscow,

<sup>3</sup> College of Harbour and Coastal Engineering, Jimei University, Xiamen 361021, China

\* Correspondence: 7390530@gmail.com; Tel.: +7-(903)-7390530

This PDF file includes:

Figures S1–S11

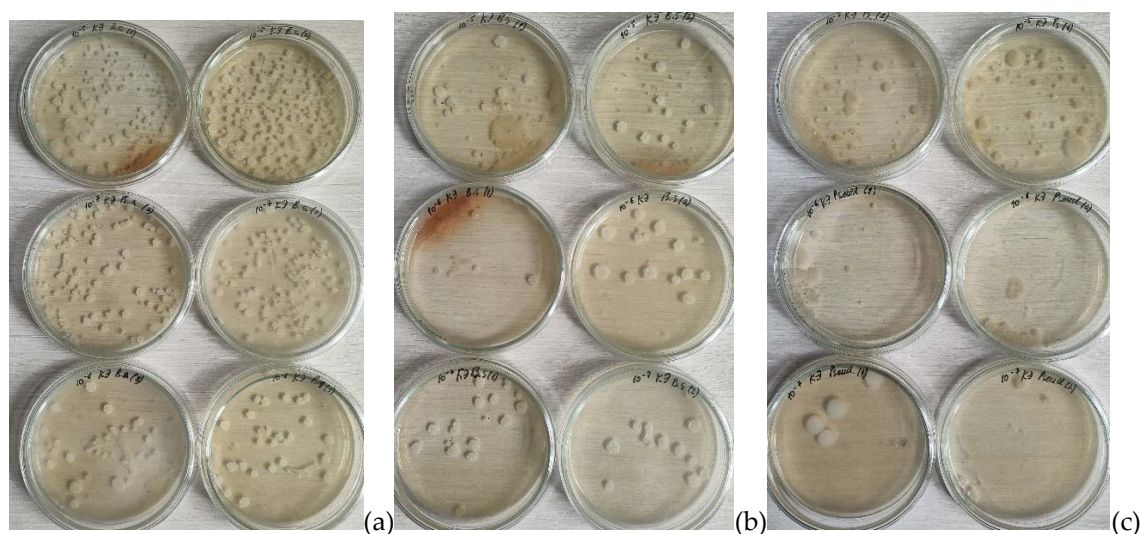

Figure S1 – Survival rate of bacteria introduced to compost (C7) after introducing bacteria: (a) *Bacillus amyloliquefaciens*; (b) *Bacillus subtilis*; (c) *Pseudomonas aeruginosa*. Colonies formed on agarized LB medium after surface seeding from serial ten-fold dilutions (variants of three dilutions in two-fold replications are presented)

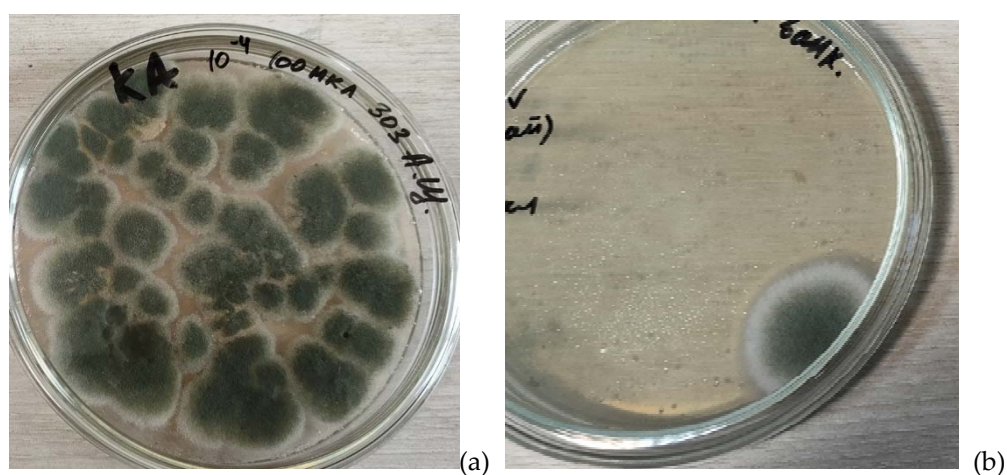

Figure S2 – *Aspergillus corrugatus*: (a) colonies of the fungus formed on PDA medium after surface seeding from one of the spore suspension serial dilutions; (b) colony formed on PDA medium via surface seeding from the last serial dilution of the compost suspension (C7) (analysis of the survival rate in compost after introducing fungus).

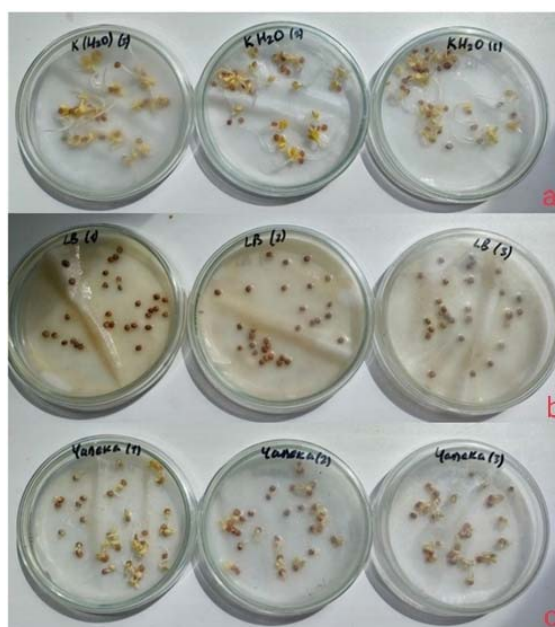

Figure S3 – Effect of undiluted liquid nutrient LB (Luria–Bertani) and Czapek media on test plant (*Raphanus sativus*) seed growth: (a) control (water)—no plant growth inhibition; (b) LB medium—complete inhibition of plant growth; (c) Czapek medium—lower but significant inhibition of plant growth.

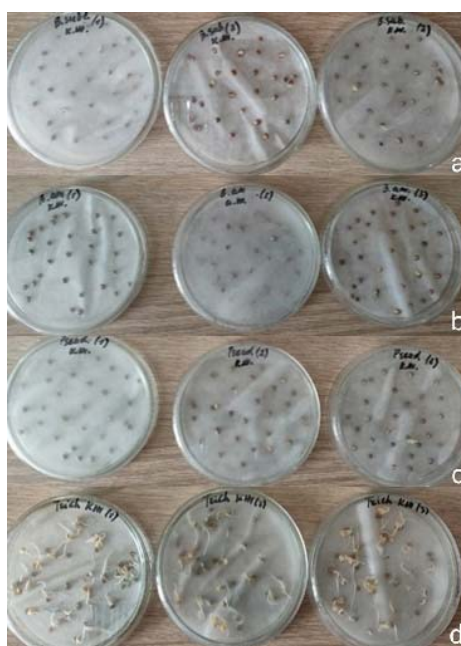

Figure S4 – Inhibition of seed germination induced by culture supernatants without dilution: (a) *Bacillus amyloliquefaciens*; (b) *Bacillus subtilis*; (c) *Pseudomonas aeruginosa*; (d) *Aspergillus corrugatus*.

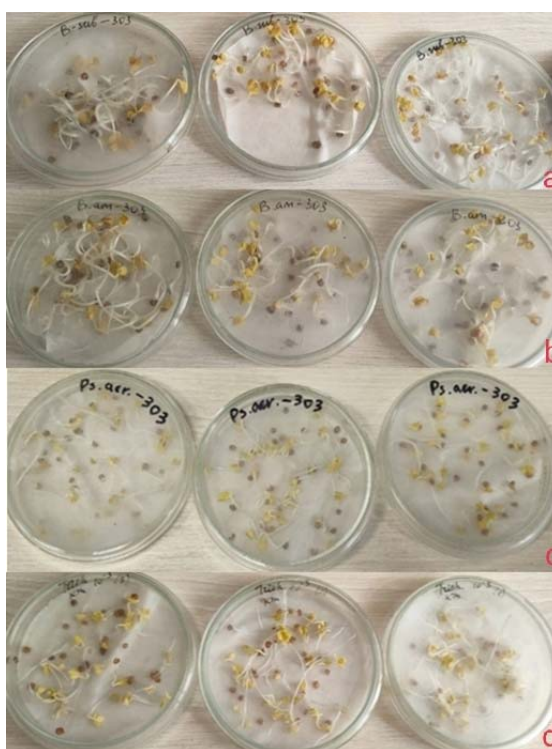

Figure S5 – Analysis results for diluted (1:1000) culture supernatants: (a) *Bacillus subtilis*; (b) *Bacillus amyloliquefaciens*; (c) *Pseudomonas aeruginosa*; (d) *Aspergillus corrugatus*. *B. subtilis* and *B. amyloliquefaciens*—no seed germination inhibition observed, normal plant growth was noted; *P. aeruginosa* and *A. corrugatus*—less active growth.



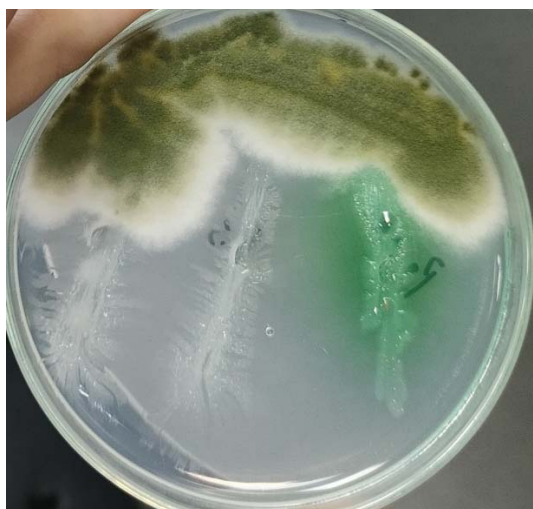

Figure S6 – Evaluation of the antagonist microorganism's compatibility before forming a composition: normal development of all four cultures. No zones of growth inhibition were noted, and compatibility was confirmed. At the top horizontally, the fungus *A. corrugatus*; bacteria are perpendicular: from left to right—*B. amyloliquefaciens*, *B. subtilis*, *P. aeruginosa*.

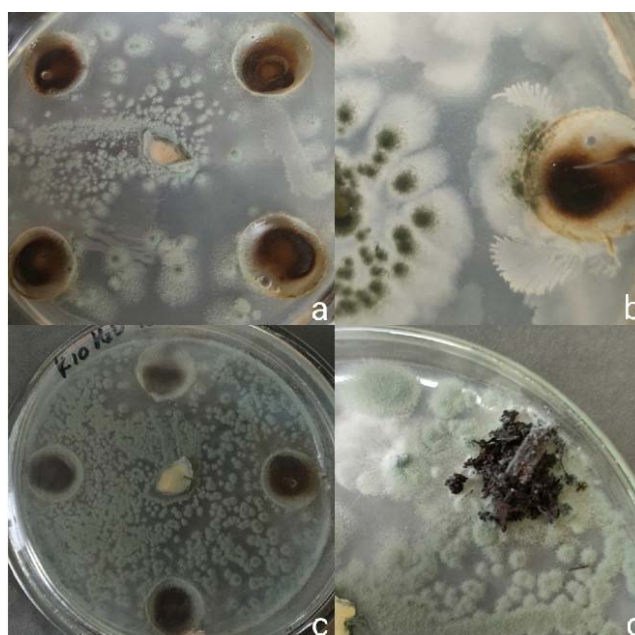

Figure S7 – Examples of no suppression of *Penicillium solitum*: (a) C7B1—phytopathogen spread over the entire surface of the Petri dish and grows in the wells with the compost suspension; (b) C7L—*P. solitum* grows in the wells with the compost suspension; (c) C7W—extensive spread of the pathogen and abundant growth in the wells; (d) C36W—phytopathogen grows on one of the compost lumps.

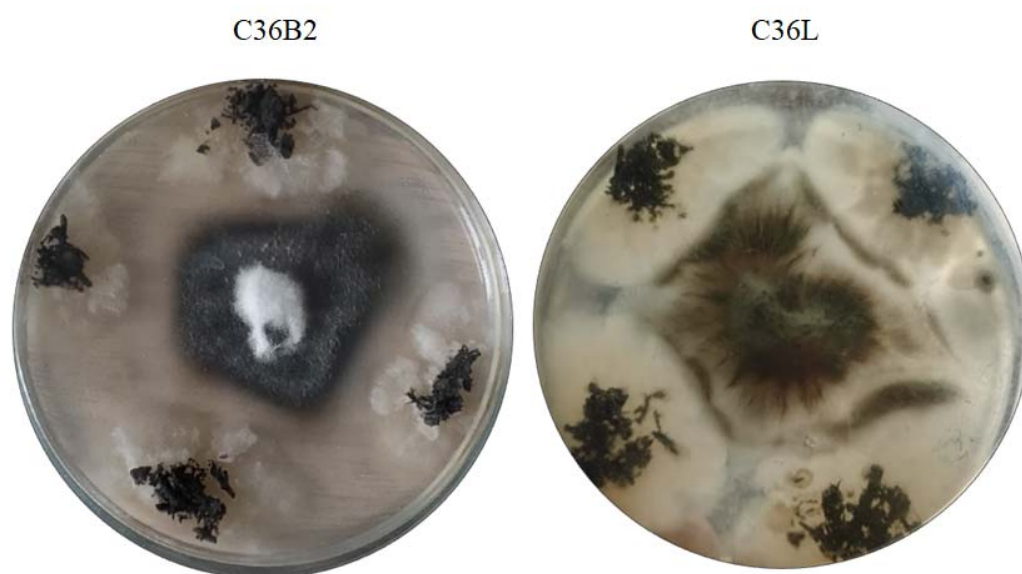

Figure S8 – Examples of the suppression effect (less mycelial growth inhibition of *Alternaria alternata* than in the best variants, with introduced microorganism composition): left—the effect of variant C36B2; right—C36L. C36L—physical interaction between compost micromycetes and phytopathogen is observed; for C36B2, both zones of inhibition and physical interaction are visible (different antagonism mechanisms).

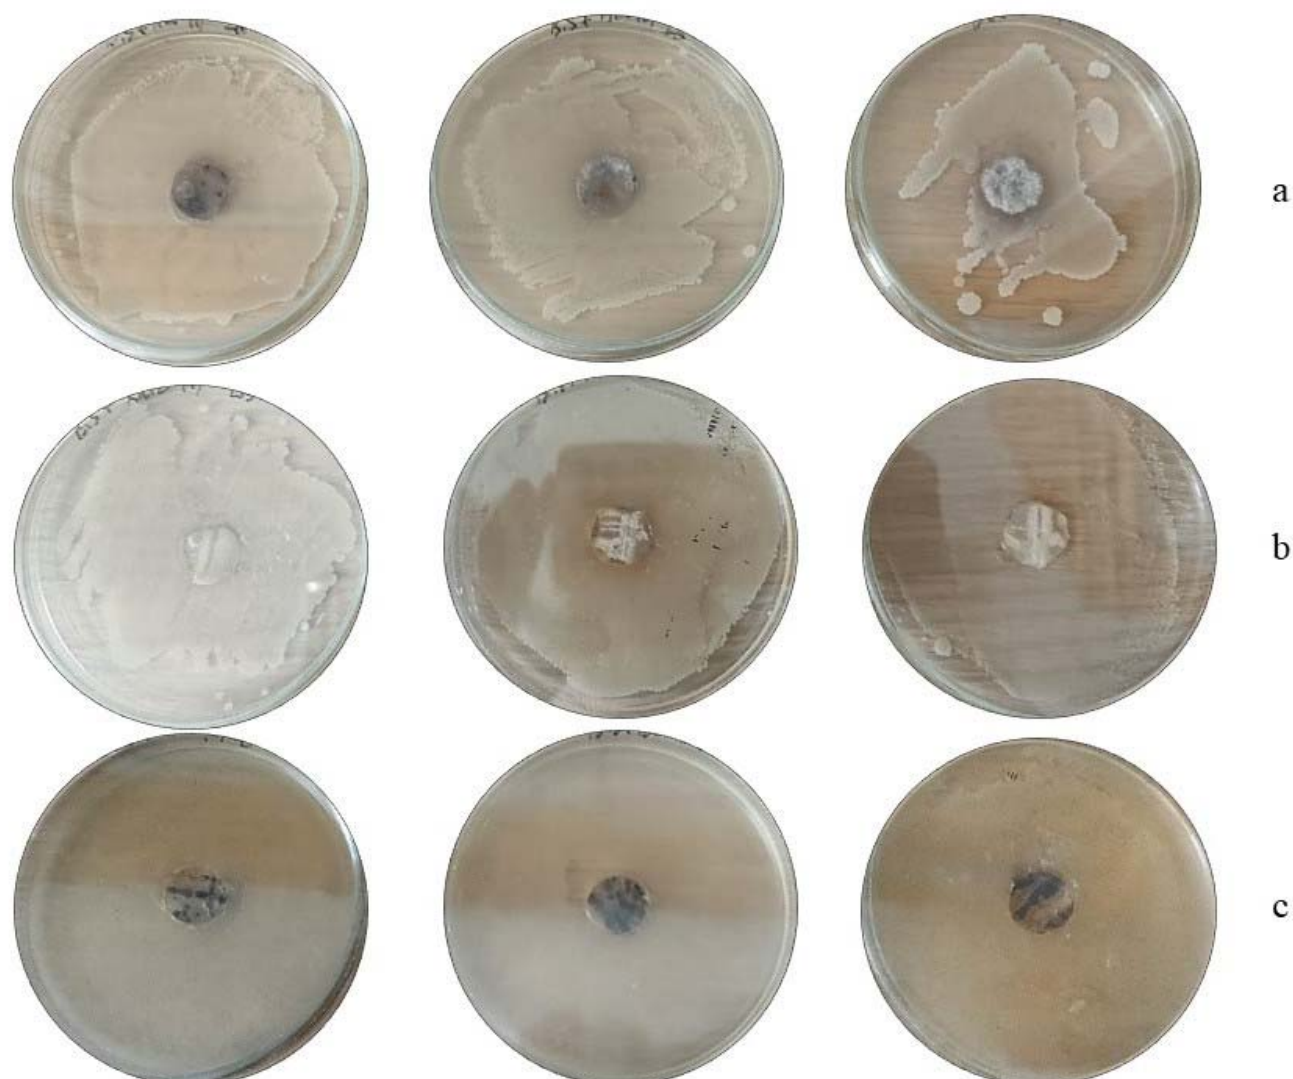

Figure S9 – Examples of the suppression effect (pure culture of antagonistic bacteria *B. subtilis* against phytopathogens): (a) bacteria spread over the entire surface of the Petri dish, no growth of *A. alternata* is observed; (b) bacteria spread over the entire surface of the Petri dish, no growth of *C. rosea* is observed; (c) bacteria spread over the entire surface of the Petri dish, no growth of *P. solitum* is observed. Three repetitions of each experiment.

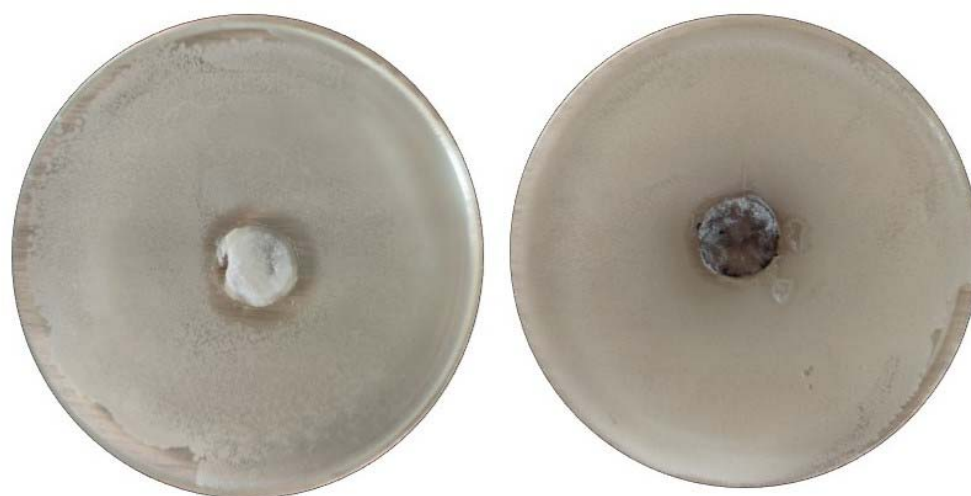

Figure S10 – Examples of the suppression effect (pure culture of antagonistic bacteria *B. amyloliquefaciens* against phytopathogens): left—bacteria spread over the entire surface of the Petri dish, no growth of *C. rosea* is observed; right—bacteria spread over the entire surface of the Petri dish, no growth of *A. alternata* is observed.

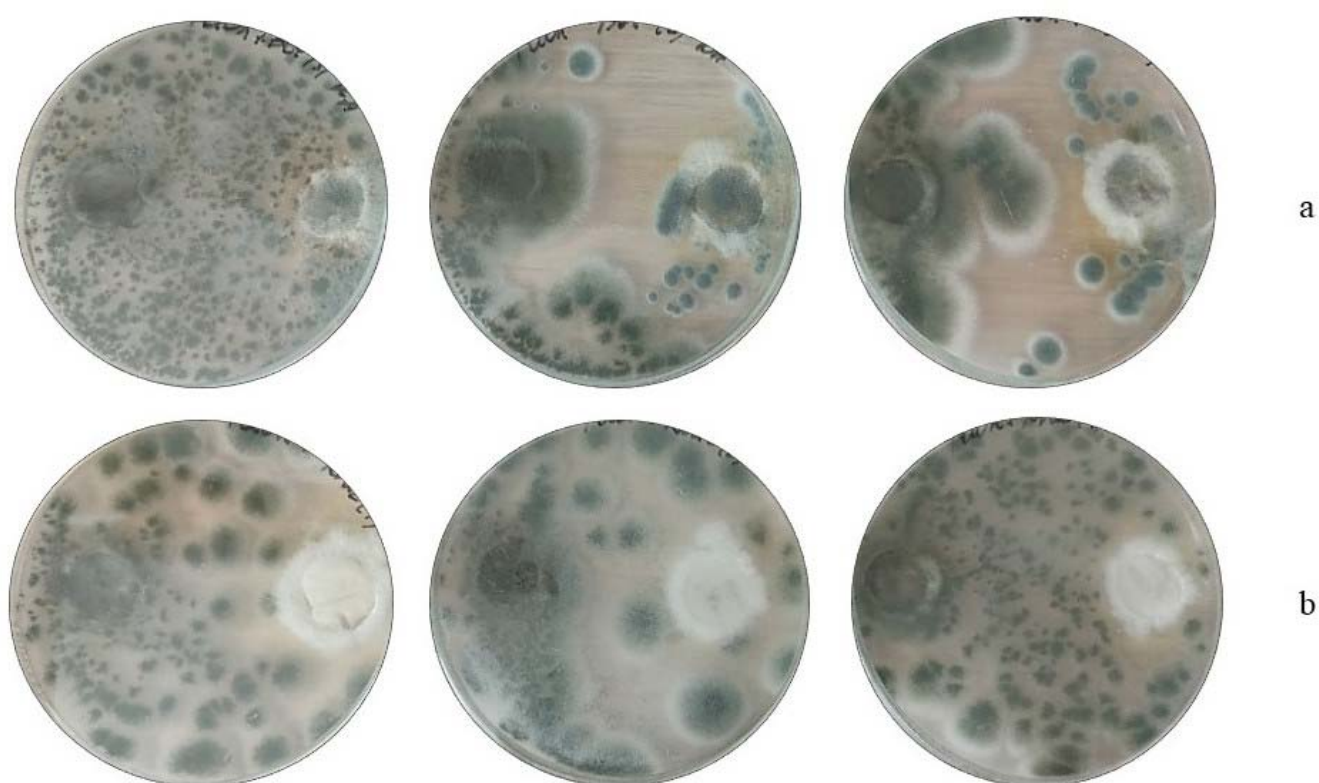

Figure S11 – Examples of the suppression effect (pure culture of antagonistic fungus *A. corrugatus* against phytopathogens): (a) the fungus takes up from 47 to 94% of the Petri dish area, *P. solitum* takes up from 6 to 29% of the Petri dish area; (b) the fungus takes up from 86 to 94% of the Petri dish area, *C. rosea* takes up from 6 to 14% of the Petri dish area. Three repetitions of each experiment.
